# Supplementary figures and images for: Arginyltransferase regulates alpha cardiac actin function, myofibril formation and contractility during heart development
Source: Oxford University Press journal article supplement (doi:10.1242/dev.022723), 2008-10-24

gel\_5\_Oct06 #5570 RT: 48.27 AV: 1 NL: 2.74E3  
 T: ITMS + c ESI d Full ms2 785.16@cid35.00 [205.00-2000.00]

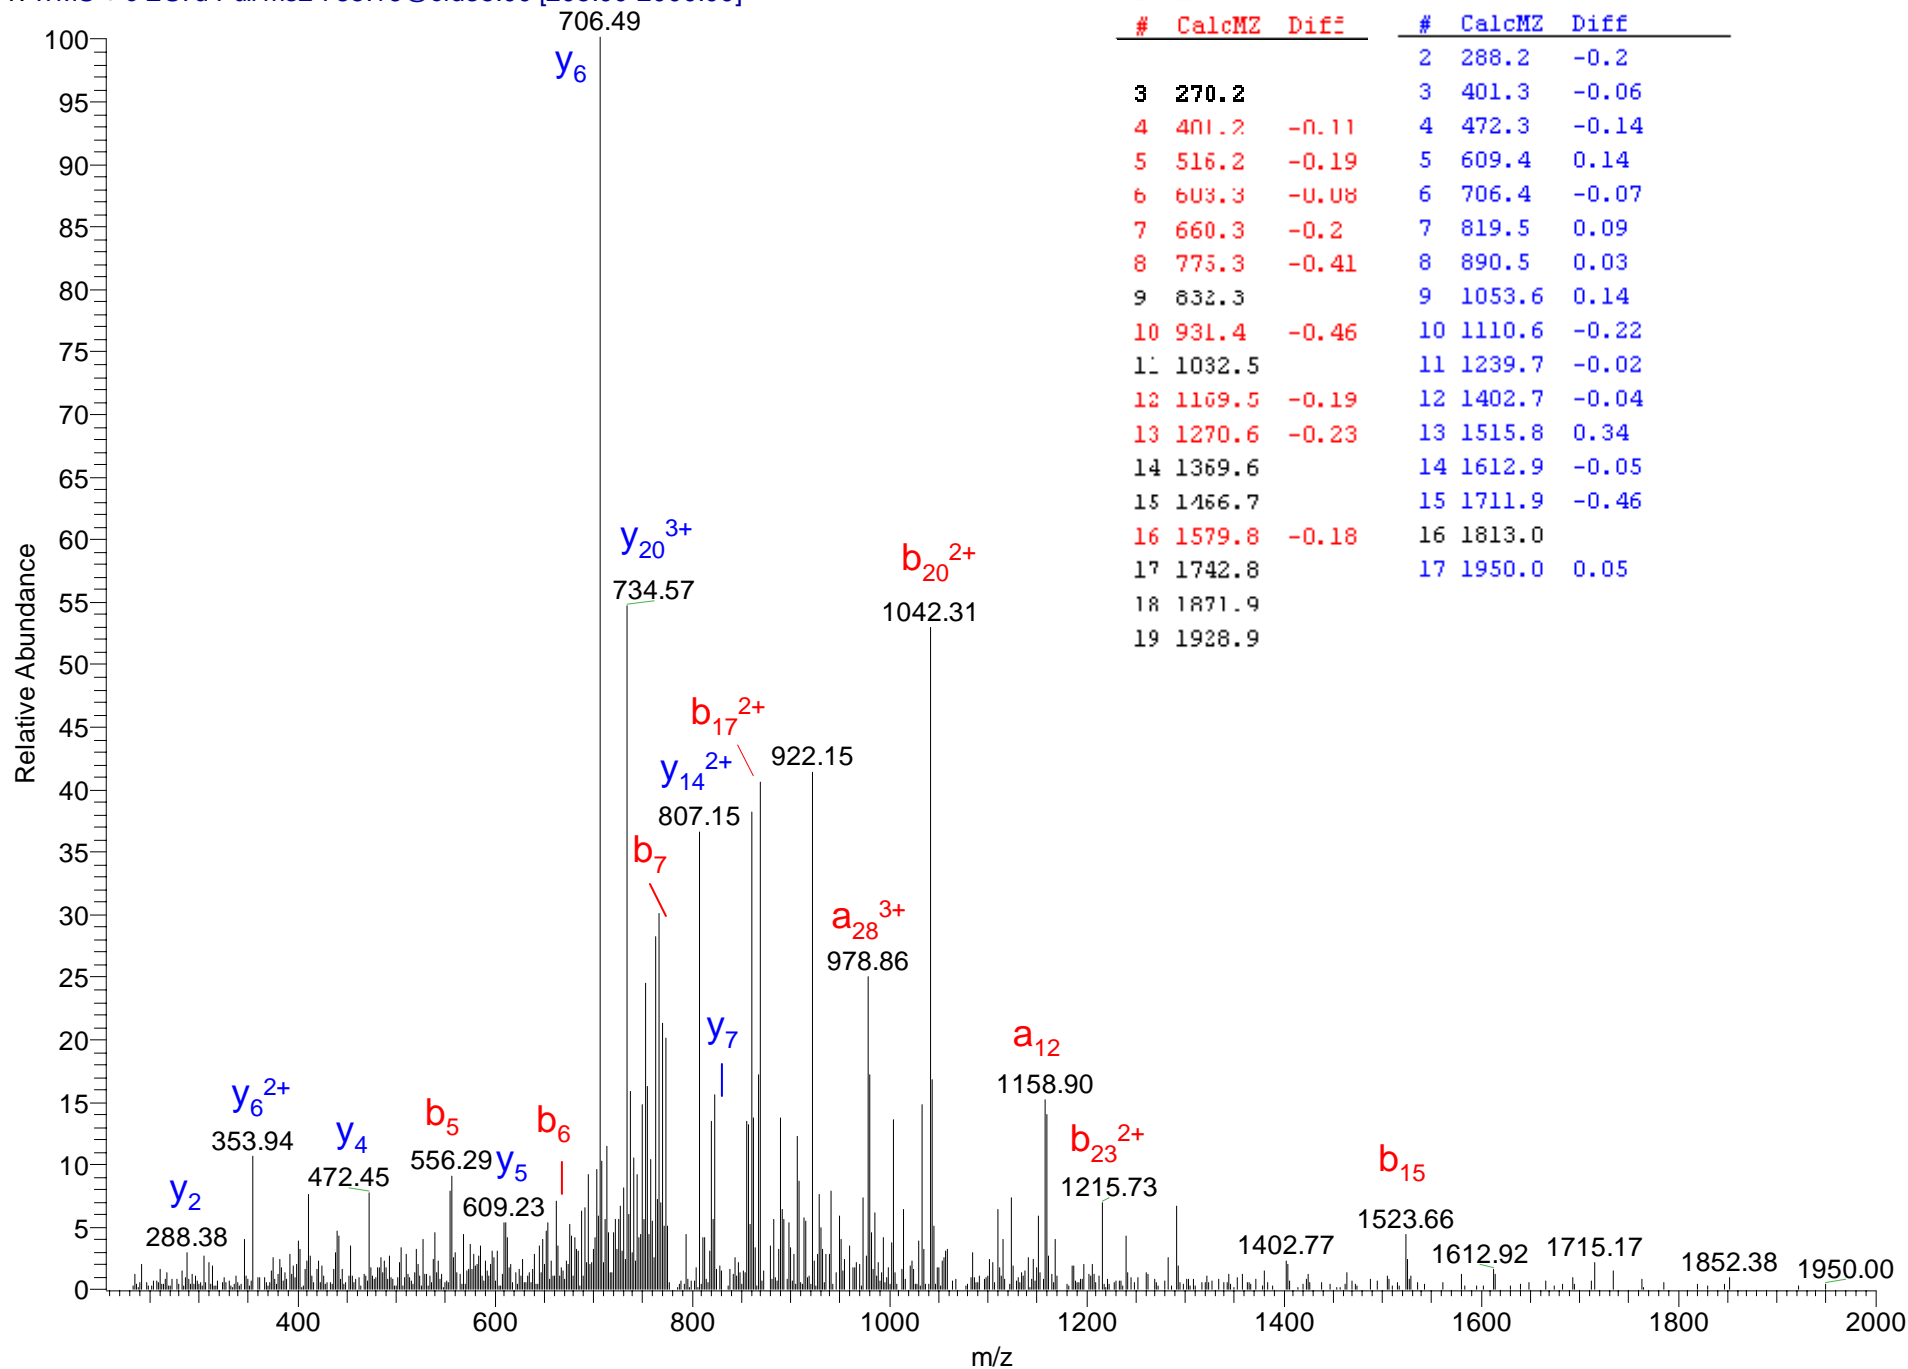

Supplement: dev022723-sup-022723-figs1.pdf [file dev022723-sup-022723-figs1.pdf]

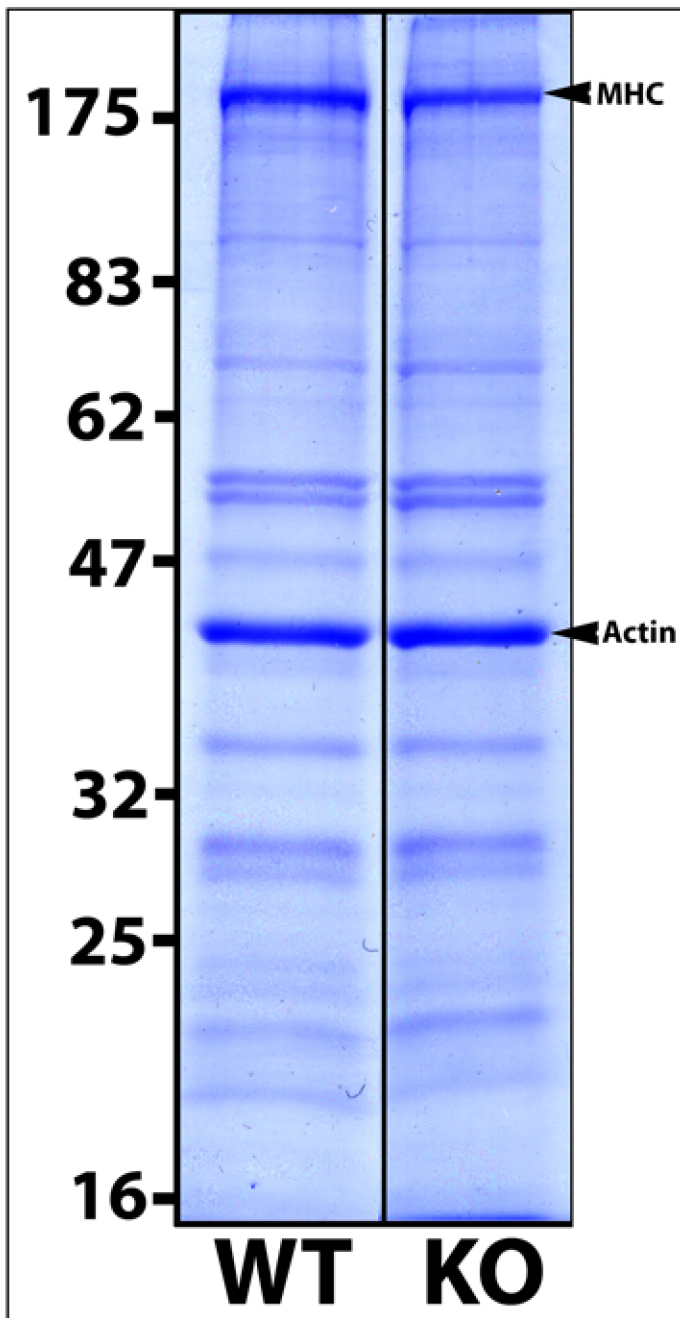

**MHC:Actin ratio:**

**WT=0.94+/-0.07  
(n=3)**

**KO=0.91+/-0.16  
(n=4)**

**Actin distribution:**

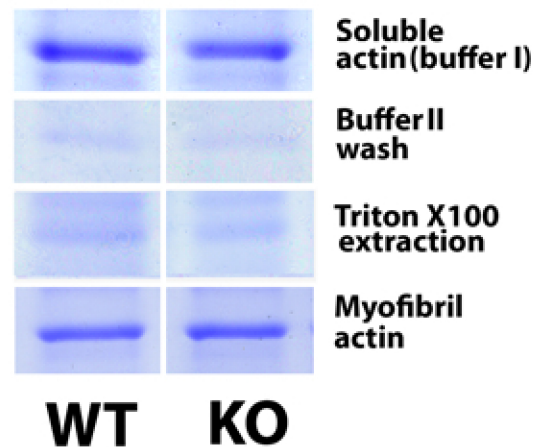

Supplement: dev022723-sup-022723-figs2.pdf [file dev022723-sup-022723-figs2.pdf]

less developed

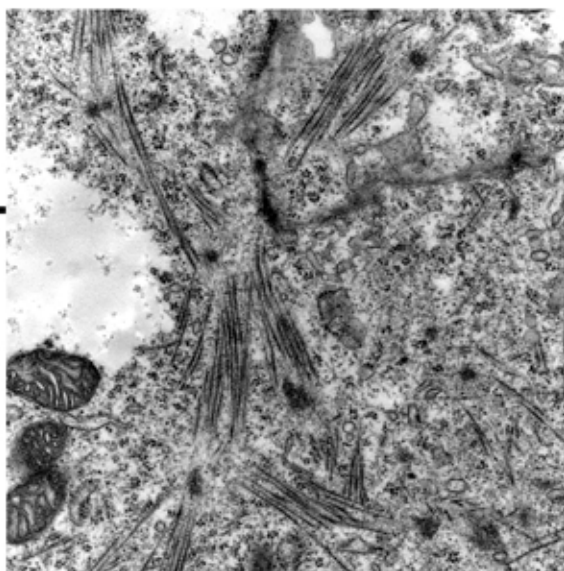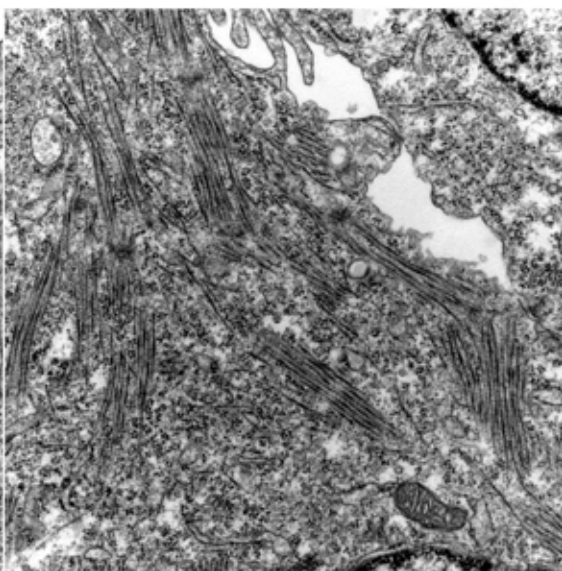

more developed

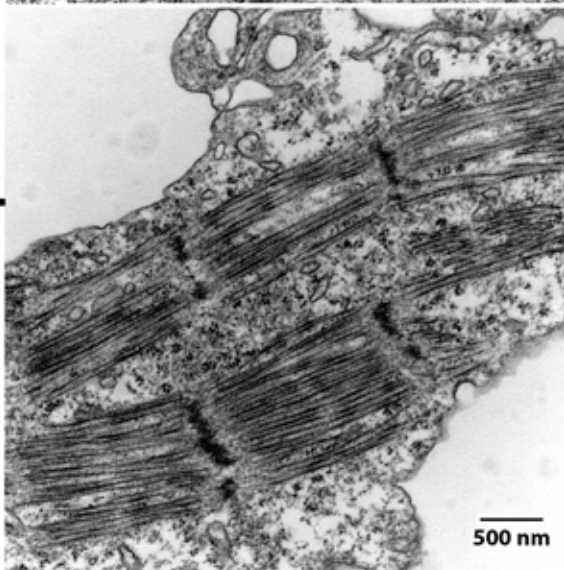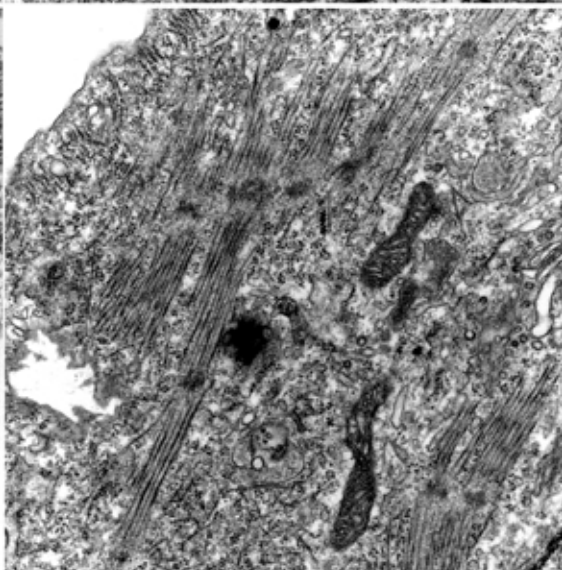

WT

KO

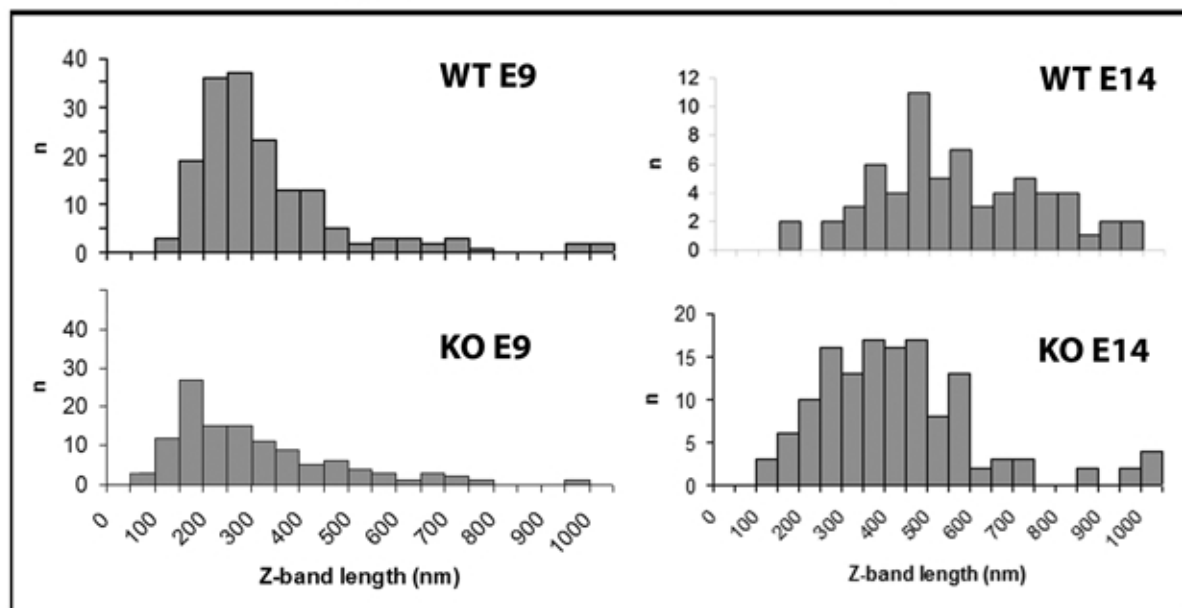

Supplement: dev022723-sup-022723-figs3.pdf [file dev022723-sup-022723-figs3.pdf]

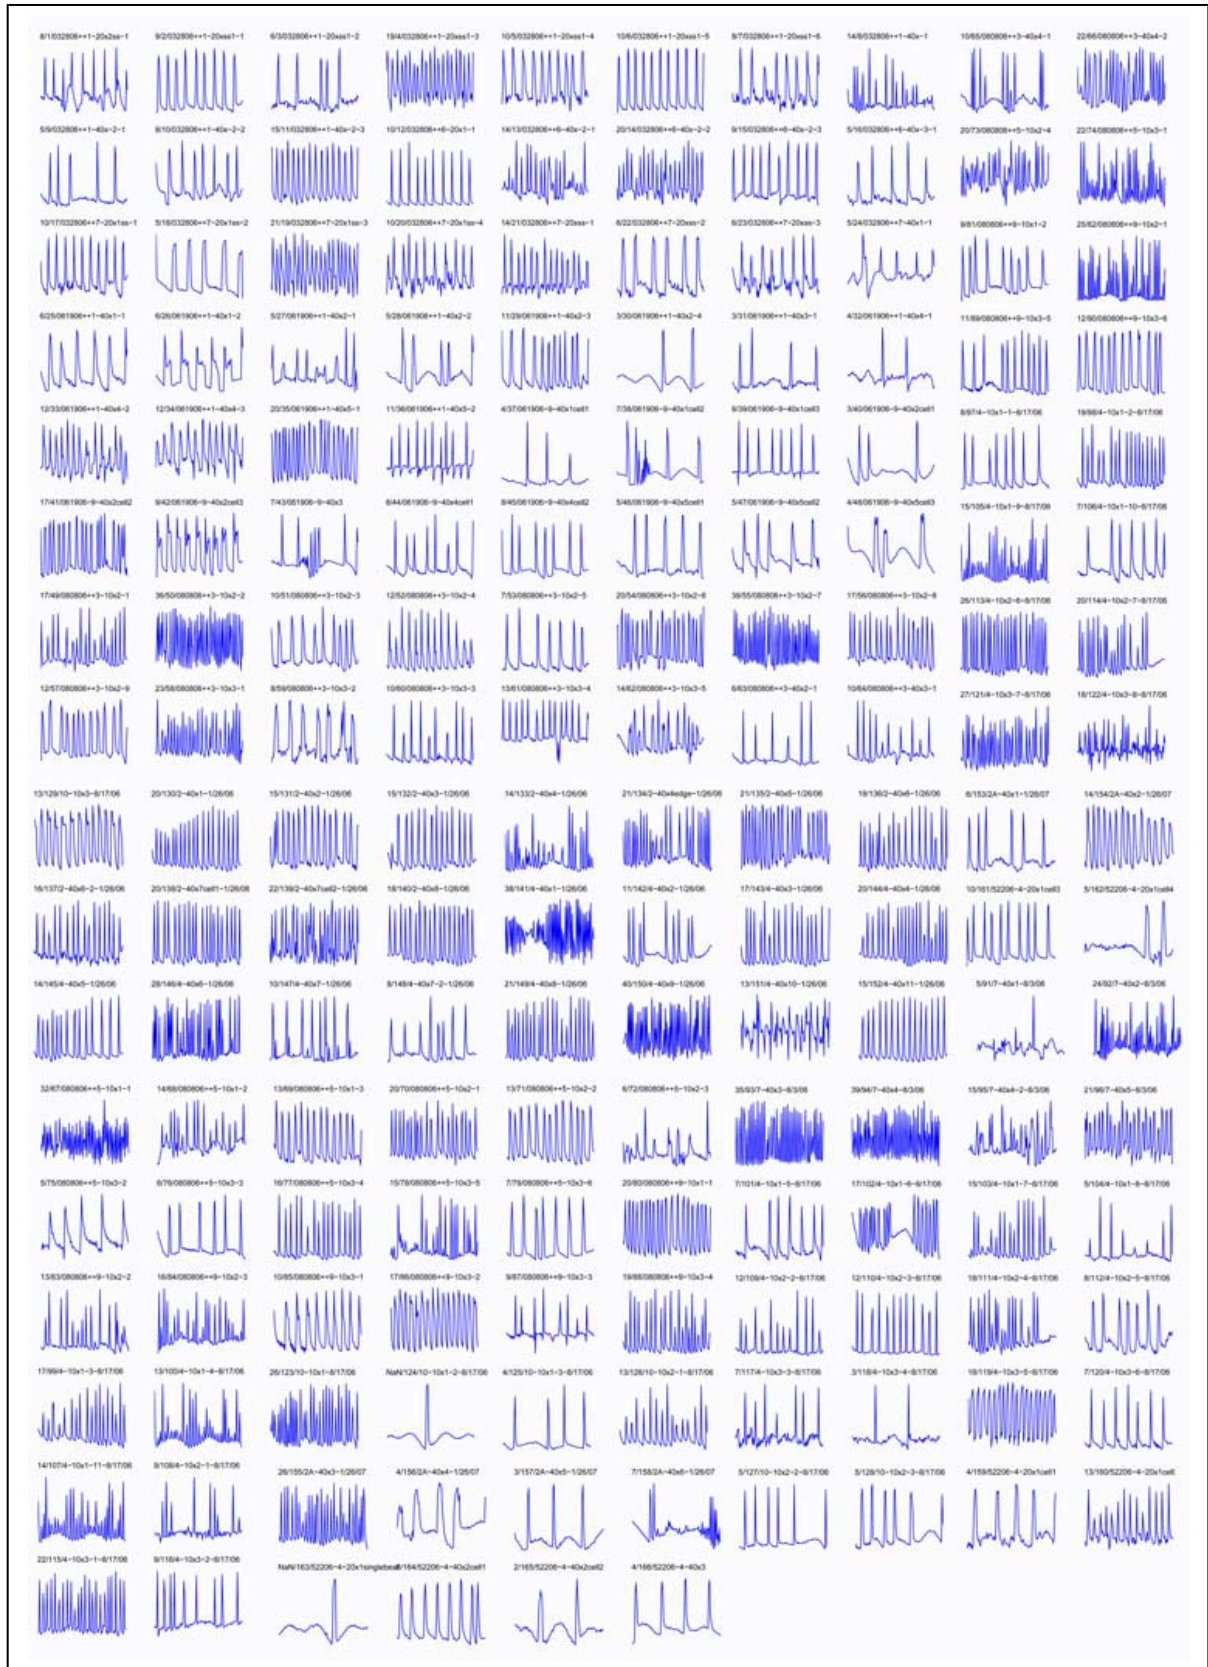

Supplement: dev022723-sup-022723-figs4.pdf [file dev022723-sup-022723-figs4.pdf]

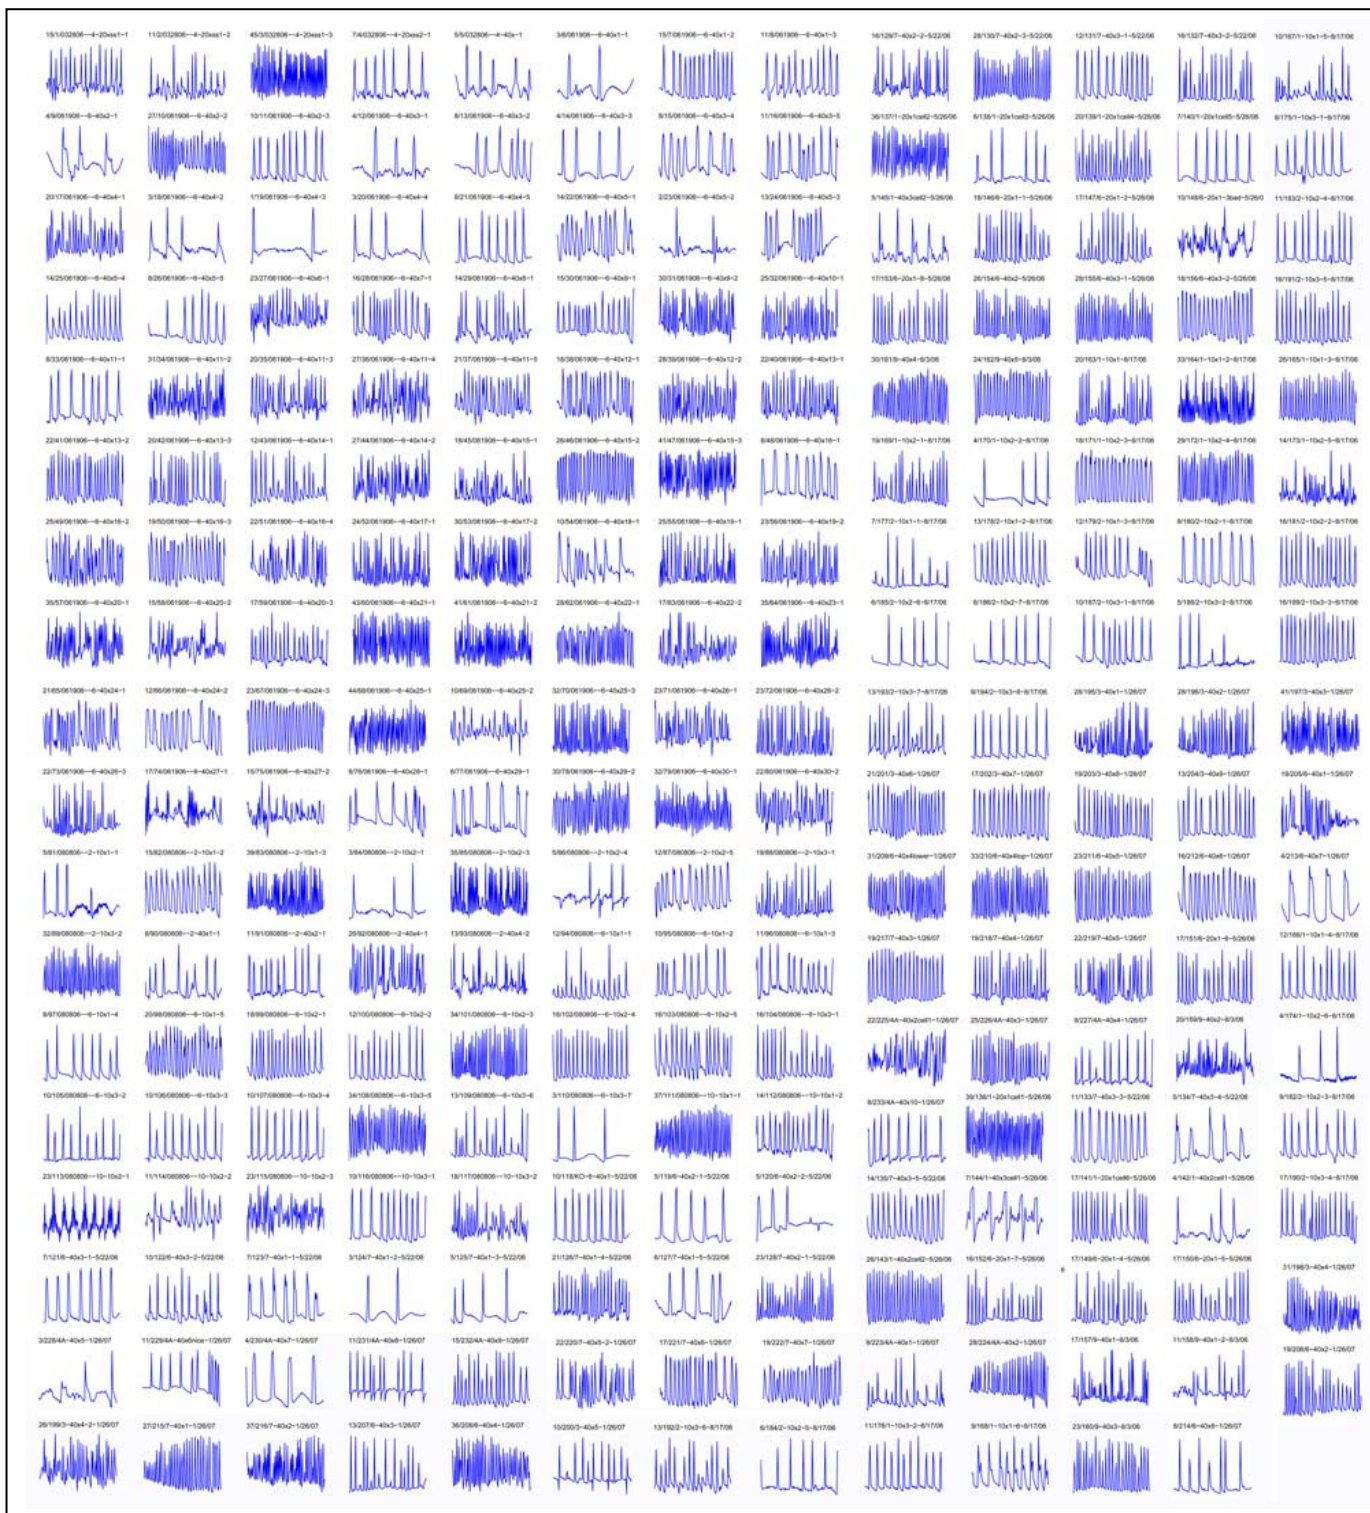

Supplement: dev022723-sup-022723-figs5.pdf [file dev022723-sup-022723-figs5.pdf]

**WT**

**phase**

**calcium**

**KO**

**phase**

**calcium**

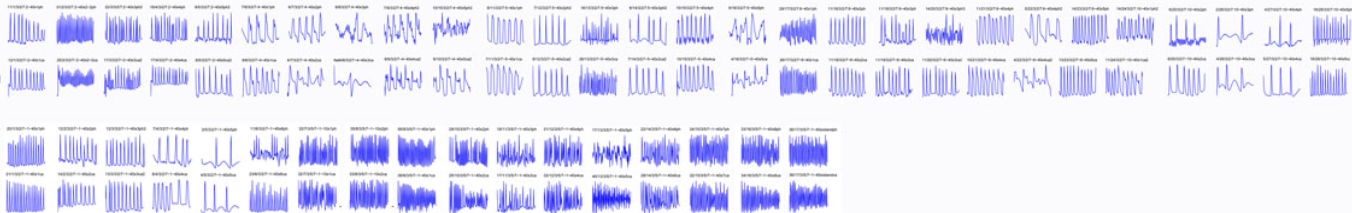

Supplement: dev022723-sup-022723-figs6.pdf [file dev022723-sup-022723-figs6.pdf]
